# Supplementary material
Source: Springer Nature journal article supplement (https://www.springermedizin.de/resource/supplementary/12906_2012_1263_MOESM1_ESM.pdf/9520080)

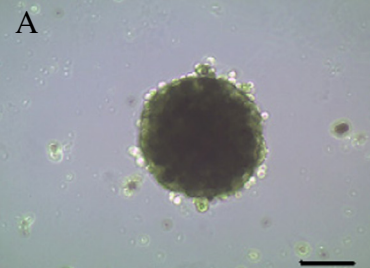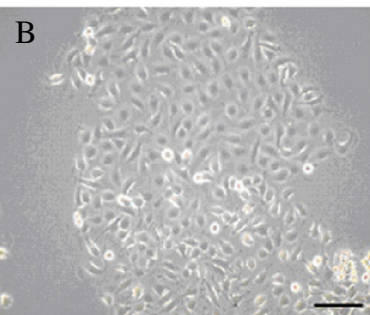

Parental

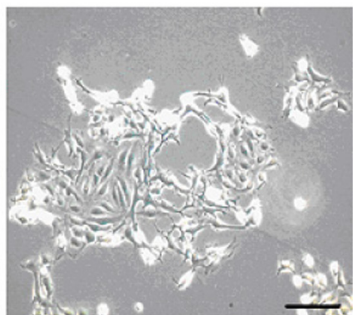

Sphere derived cells

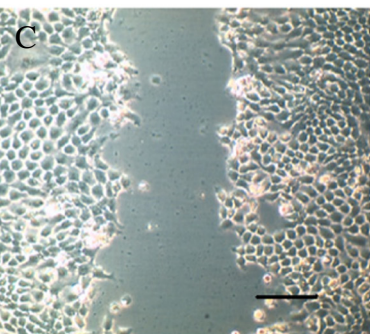

Parental

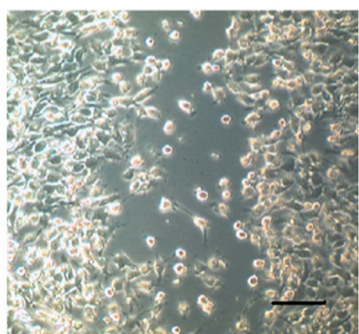

Sphere derived cells

Supplement: MOESM1 [file 9520080]
